# Supplementary material for: Vaccination of Silver Sea Bream (Sparus sarba) against Vibrio alginolyticus: Protective Evaluation of Different Vaccinating Modalities
Source: PubMed Central journal article supplement (PMC4730285; doi:10.3390/ijms17010040), 2015-12-29
Supplement: ijms-17-00040-s001.pdf [file ijms-17-00040-s001.pdf]

## Supplementary Materials: Vaccination of Silver Sea Bream (*Sparus sarba*) against *Vibrio alginolyticus*: Protective Evaluation of Different Vaccinating Modalities

Jun Li, Siyuan Ma and Norman Y. S. Woo

**Table S1.** Effects of inoculation of different vaccines on the spleno-somatic index (SSI) and hematological parameters in silver sea bream, *Sparus sarba*.

| Vaccines          | SSI (%)           | Hematocrit (%) | Hemoglobin (g/dL) | Lymphocyte (k/mm <sup>3</sup> ) |
|-------------------|-------------------|----------------|-------------------|---------------------------------|
| Saline            | 0.048 ± 0.004     | 46.8 ± 2.4     | 7.90 ± 0.43       | 30.4 ± 1.6                      |
| LPS               | 0.040 ± 0.001     | 37.9 ± 3.5     | 8.00 ± 0.45       | 47.9 ± 3.5 ***                  |
| Formalin-killed   | 0.023 ± 0.002 *** | 52.2 ± 1.7     | 10.6 ± 0.6 *      | 42.9 ± 1.8 ***                  |
| Phenol-killed     | 0.026 ± 0.003 **  | 49.9 ± 1.8     | 8.97 ± 0.69       | 42.4 ± 2.0 ***                  |
| Heat-killed       | 0.059 ± 0.005     | 37.7 ± 3.0     | 8.78 ± 0.59       | 28.7 ± 1.4                      |
| Chloroform-killed | 0.071 ± 0.004 *** | 41.9 ± 1.2     | 8.93 ± 0.46       | 30.0 ± 2.1                      |

Significant difference from saline injected group at \*  $p < 0.05$ , \*\*  $p < 0.01$  and \*\*\*  $p < 0.001$ .

**Table S2.** Hematological parameters and HSI, RSI and SSI values of silver sea bream immunized with formalin-killed bacterins through different administration routes. ( $N = 7$ ).

| Immunization Route | HSI (%)       | RSI (%)       | SSI (%)         | Hct (%)      | Hb (g/100 mL) | RBC (×10 <sup>6</sup> cells/mL) | WBC (×10 <sup>3</sup> cells/mL) |
|--------------------|---------------|---------------|-----------------|--------------|---------------|---------------------------------|---------------------------------|
| i.p. + i.p.-V      | 0.77 ± 0.12 * | 0.38 ± 0.02 * | 0.131 ± 0.030 * | 31.39 ± 1.10 | 7.31 ± 0.54   | 4.26 ± 0.28                     | 11.5 ± 1.23 *                   |
| i.p. + i.p.-C      | 0.49 ± 0.03   | 0.27 ± 0.01   | 0.039 ± 0.004   | 32.88 ± 1.23 | 6.81 ± 0.37   | 4.44 ± 0.19                     | 7.00 ± 1.41                     |
| i.p. + imm.-V      | 0.80 ± 0.10   | 0.27 ± 0.01 * | 0.051 ± 0.017   | 33.42 ± 2.21 | 9.62 ± 0.62   | 4.67 ± 0.19                     | 11.2 ± 2.71 **                  |
| i.p. + imm.-C      | 0.69 ± 0.03   | 0.23 ± 0.007  | 0.071 ± 0.006   | 32.51 ± 2.70 | 8.26 ± 0.36   | 4.61 ± 0.18                     | 3.00 ± 0.55                     |
| imm. + imm.-V      | 0.75 ± 0.04 * | 0.26 ± 0.01 * | 0.047 ± 0.008   | 29.69 ± 2.83 | 7.99 ± 0.71   | 4.75 ± 0.28                     | 7.20 ± 2.71                     |
| imm. + imm.-C      | 0.60 ± 0.02   | 0.22 ± 0.005  | 0.056 ± 0.011   | 28.60 ± 1.38 | 9.32 ± 0.48   | 4.13 ± 0.14                     | 5.00 ± 0.32                     |
| Oral-V             | 1.07 ± 0.09 * | 0.28 ± 0.01   | 0.054 ± 0.017   | 27.10 ± 2.26 | 7.36 ± 0.54   | 4.17 ± 0.29                     | 6.20 ± 2.08                     |
| Oral-C             | 0.75 ± 0.03   | 0.24 ± 0.03   | 0.041 ± 0.011   | 29.46 ± 1.01 | 7.90 ± 0.42   | 4.09 ± 0.14                     | 6.40 ± 1.50                     |

Significant difference from saline injected group at \*  $p < 0.05$  and \*\*  $p < 0.01$ .
